# Supplementary material for: Spatial transcriptomics landscape of lesions from non-communicable inflammatory skin diseases
Source: Springer Nature journal article supplement (doi:10.1038/s41467-022-35319-w), 2022-12-13
Supplement: MOESM1 [file 41467_2022_35319_MOESM1_ESM.pdf › 41467_2022_35319_MOESM1_ESM.pdf]

# Supplementary Information

## Supplementary Figures

### Supplementary Figure 1

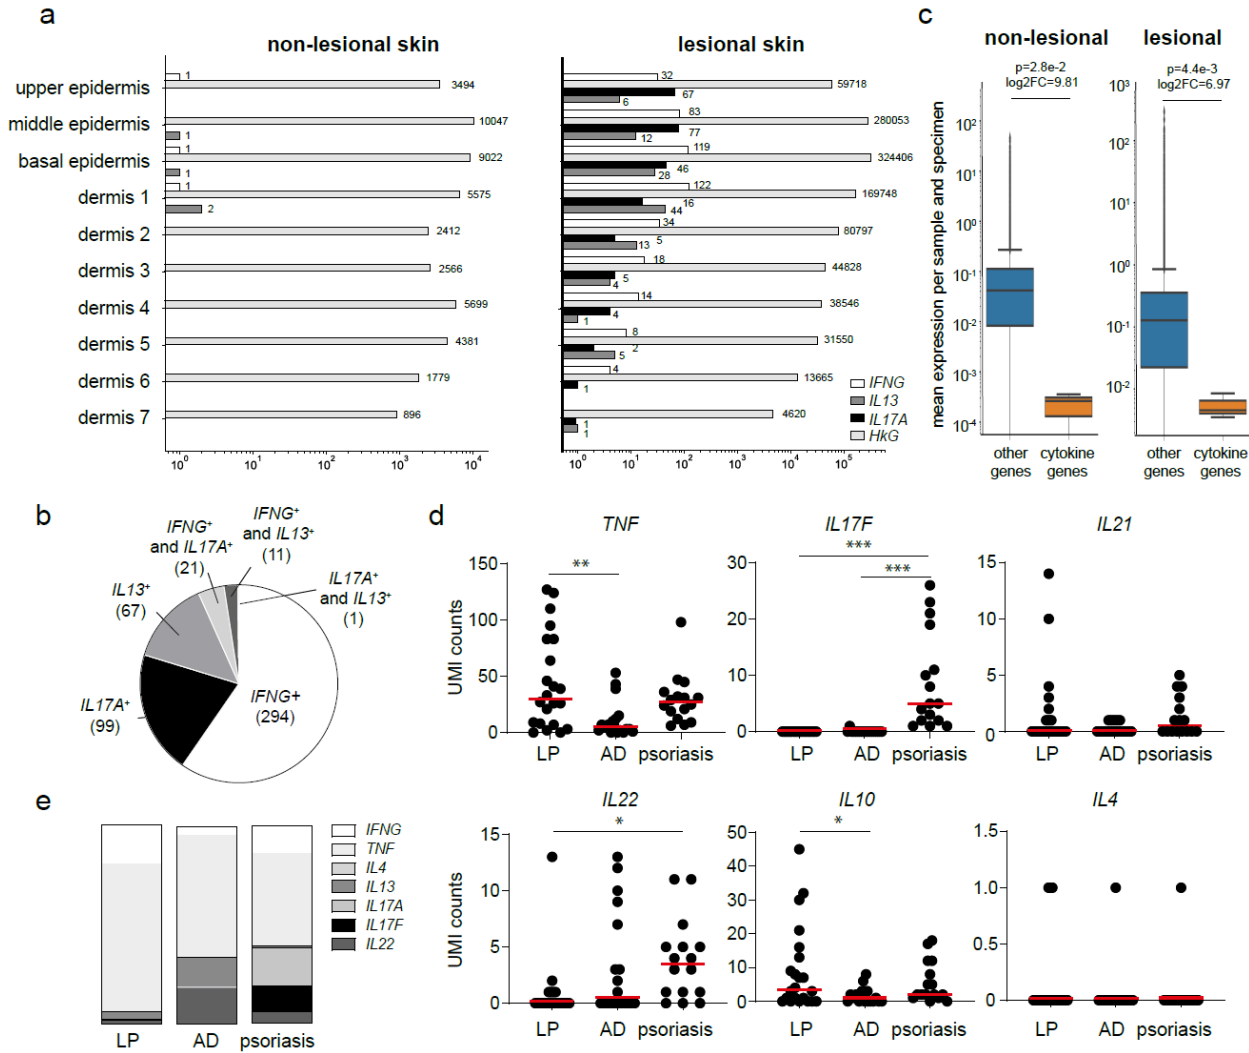

**Supplementary Figure 1:** NcISD are characterized by low cytokine UMI counts in skin

**a)** Total UMI counts in spatial sections for *IFNG*, *IL17A*, *IL13* and the housekeeping gene *GAPDH* (*HkG*) in non-lesional and lesional skin separated by the location in the skin. **b)** Percentage of cytokine single and double-transcript positive cells. **c)** Mean expression per sample and specimen of cytokine (*IFNG*, *IL13*, *IL17A*) (orange) and all other genes (blue) in non-lesional (n=14) and lesional skin (n=31). Two-sided Mann-Whitney test was used as a statistical test. (non-lesional (others; cytokines): median (0; 0), mean (1.82e-1; 2.02e-4), min (0; 0), max (3e-1; 0), Q1(0;0), Q3 (1e-1; 0), whiskers (0; 1e-1); lesional (others; cytokines): median (1e-1; 0), mean (6.87e-1; 5.49e-3), min (0; 0), max (8e-1; 0), Q1(0;0), Q3 (4e-1; 0), whiskers (0; 4e-1) **d)** UMI counts for selected cytokines in sections of LP (n=22), atopic dermatitis (AD (n=18), and psoriasis (n=18). Statistical significance was determined using One-Way Anova and Turkey's multiple

comparisons test without FDR correction. \* $<0.05$ , \*\* $<0.01$ , \*\*\* $<0.001$ . **e)** Percentage of disease relevant cytokine UMI counts in LP, AD, and psoriasis normalised to 100%.

Supplementary Figure 2

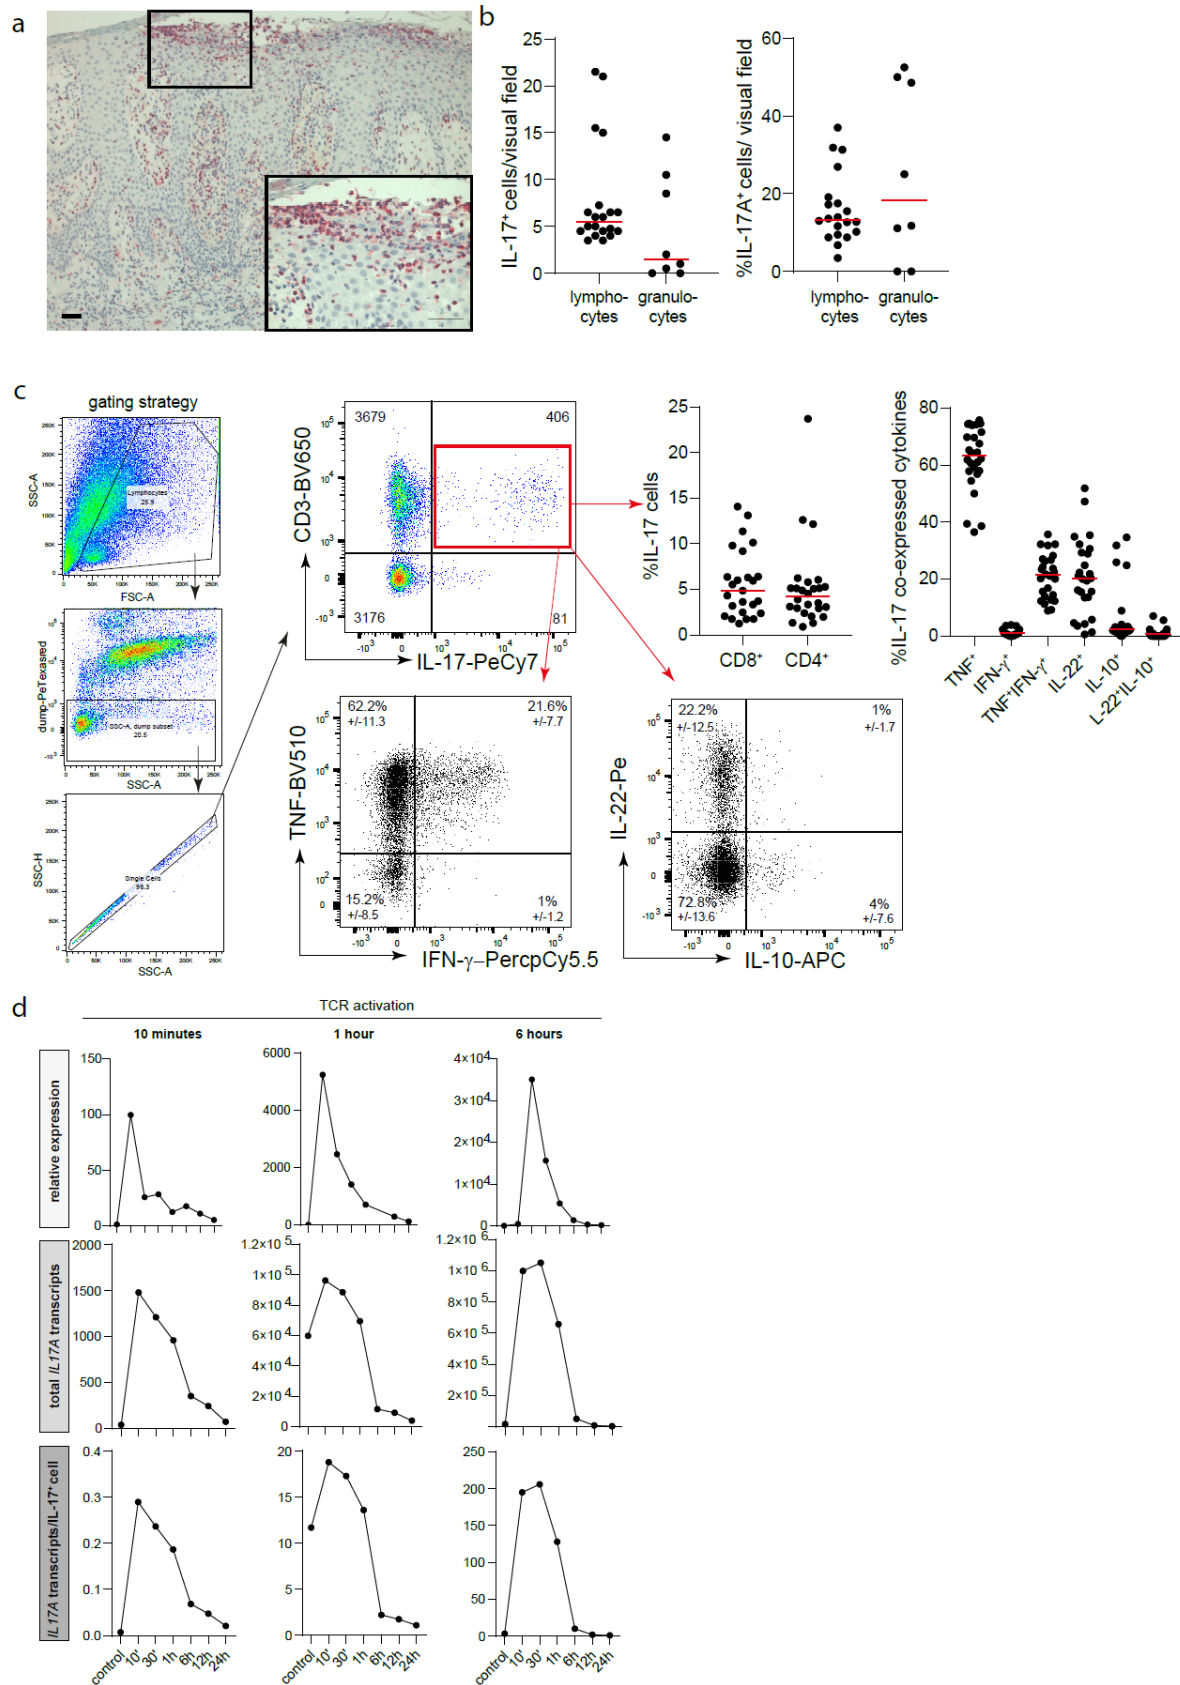

**Supplementary Figure 2:** IL-17A expression in skin lesions and infiltrating T cells and its short half-life time and low copy numbers in in vitro stimulated T cells

**a)** Representative staining of IL-17A by immunohistochemistry in a psoriasis section. Scale bar: 20µM **b)** Number (left panel) and percentage (right panel) of IL-17A<sup>+</sup> lymphocytes and granulocytes per visual field in psoriasis sections stained by immunohistochemistry (n=20 patients). **c)** Gating strategy and representative flow cytometry staining of CD3<sup>+</sup>IL-17<sup>+</sup> T cells derived from lesional psoriasis skin. CD3<sup>+</sup>IL-17<sup>+</sup> were gated to analyse co-production of IL-17A with IL-22, TNF, IL-10, and IFN-γ by intracellular flow cytometry. The graphs indicate the percentage of CD4<sup>+</sup> and CD8<sup>+</sup> cells amongst the CD3<sup>+</sup>IL-17A<sup>+</sup> cells and the frequency of IL-17A producing cells co-expressing one or two other cytokines (n=52). **d)** CD4<sup>+</sup> T cells were isolated from blood of healthy donors and stimulated with anti-CD3/anti-CD28 antibodies (TCR activation) for the indicated time. RNA was isolated over a time course of 24 h and analysed for the expression of *IL17A* by real time PCR. Relative expression of *IL17A* was calculated to unstimulated cells (upper panel). Total transcript numbers of *IL17A* were determined in each stimulatory condition using a standard curve (middle panel). By dividing the total transcript numbers by the number of cells per stimulatory conditions, the transcript number per cell could be identified (lower panel).

**Supplementary Figure 3**

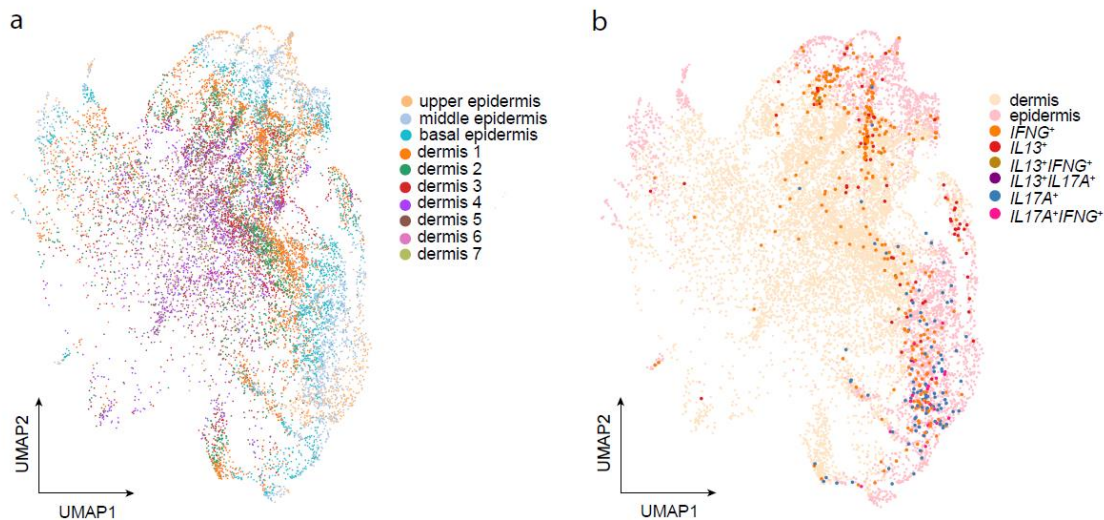

**Supplementary Figure 3:** Cytokine transcript-positive spots are located in the epidermis and enriched in lesional skin

**a)** UMAP plot highlighting the manually annotated tissue layers basal, middle and upper epidermis and dermis depth 1-7 in all spatial samples expressing leukocyte markers. **b)** UMAP plot indicating cytokine transcript-positive spots in epidermis and dermis in spatial sections expressing leukocyte markers.

Supplementary Figure 4

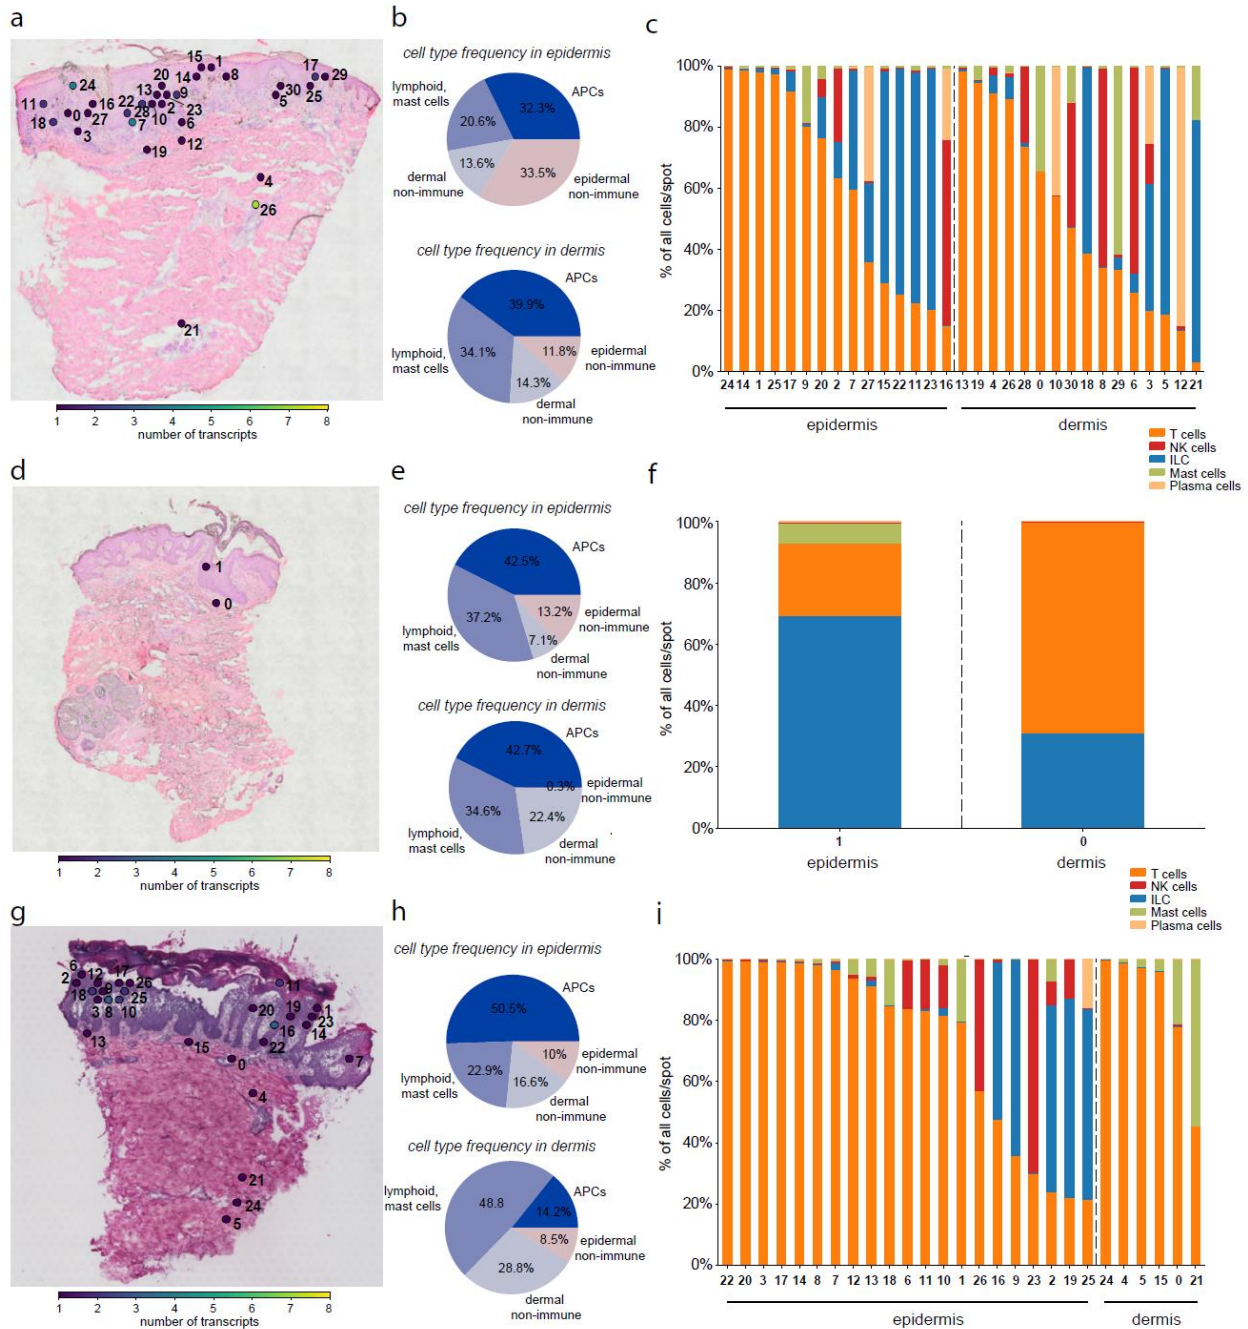

**Supplementary Figure 4:** Tangram analysis of cytokine-transcript positive spatial spots reveals heterogeneous cellular composition

Numbering of *IFNG* (a), *IL13* (d) and *IL17A* (g) transcript positive leukocyte spots in lichen planus, atopic dermatitis and psoriasis ST sections, respectively. The scale indicates the number of transcripts detected in each spot. Cellular composition of *IFNG* (b), *IL13* (e) and *IL17A* (h) transcript-positive spatial spots in epidermis and dermis. Epidermal non-immune cells: keratinocytes and melanocytes; dermal non-immune cells: fibroblasts, pericytes, Schwann cells, vascular and lymphatic endothelial cells. APC: dendritic cells, monocyte-derived dendritic cells, Langerhans cells, macrophages, inflammatory macrophages, monocyte-



derived macrophages. Zoom into the lymphoid and mast cell composition of *IFNG* (c), *IL13* (f) and *IL17A* (i) transcript-positive spatial spots in epidermis and dermis.

Supplementary Figure 5

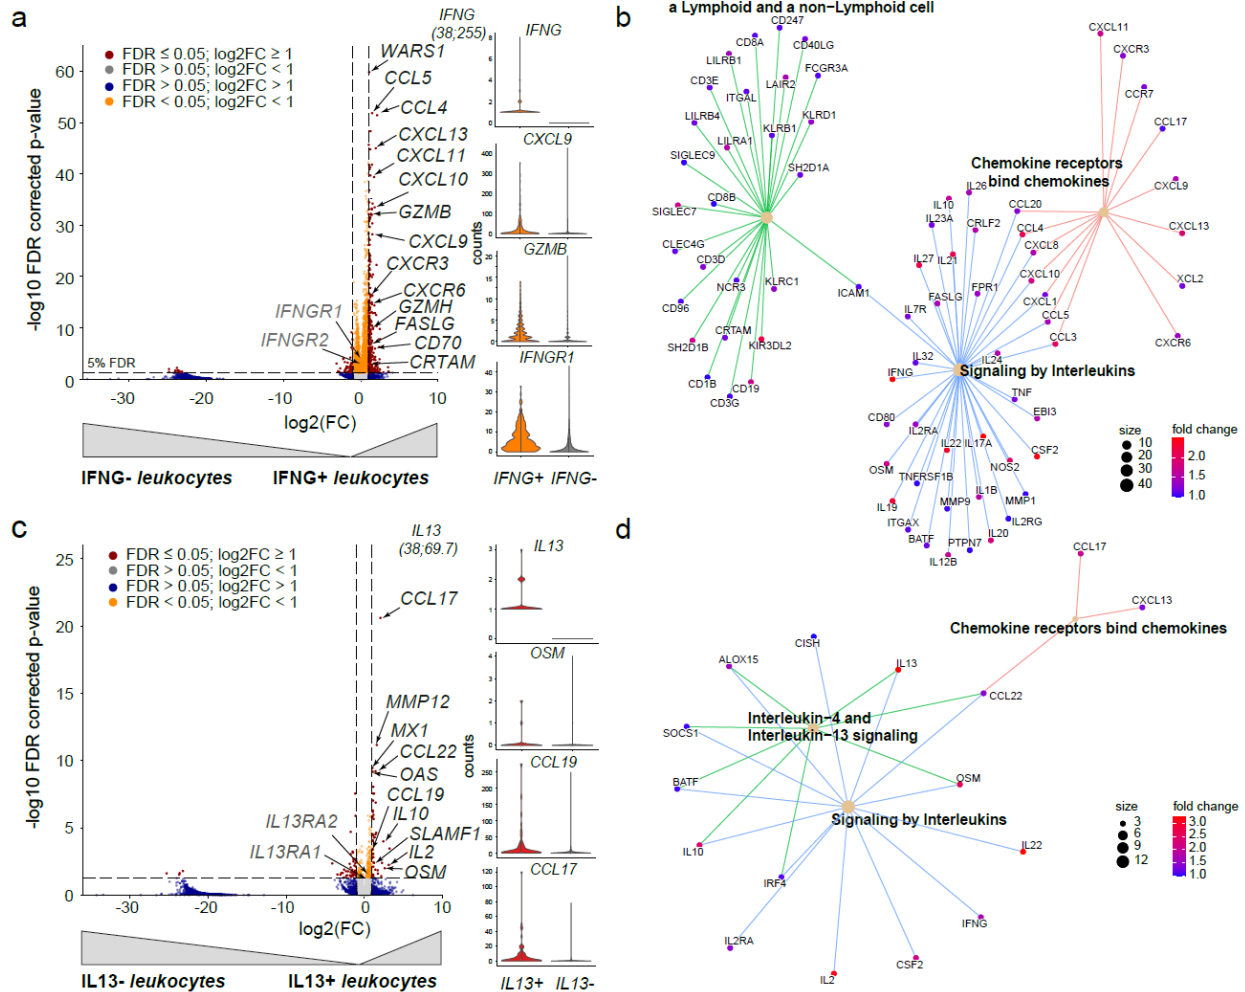

## Supplementary Figure 6

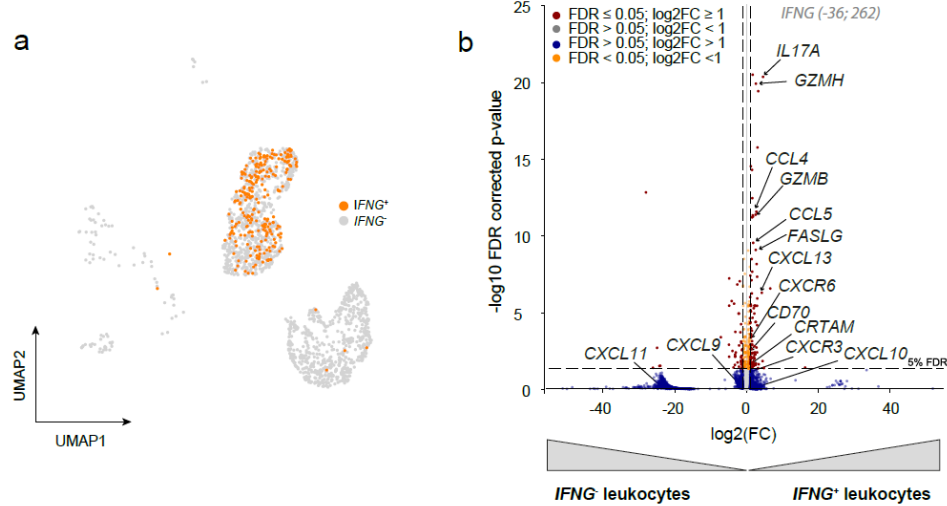

**Supplementary Figure 6:** Single-cell analysis reveals specific gene signatures for IL17A and IFNG expressing cells

**a)** UMAP plot highlighting *IFNG* transcript-positive (*IFNG*<sup>+</sup>) leukocytes in orange and *IFNG* negative (*IFNG*<sup>-</sup>) leukocytes in grey. **b)** Volcano plot analysing differentially expressed genes (DEG) *IFNG* transcript-positive (*IFNG*<sup>+</sup>) versus *IFNG* transcript-negative (*IFNG*<sup>-</sup>) leukocytes in the single-cell data set. Coordinates of *IFNG* (-36/262) are not shown. Benjamini Hochberg was used to determine statistical significance.

## Supplementary Figure 7

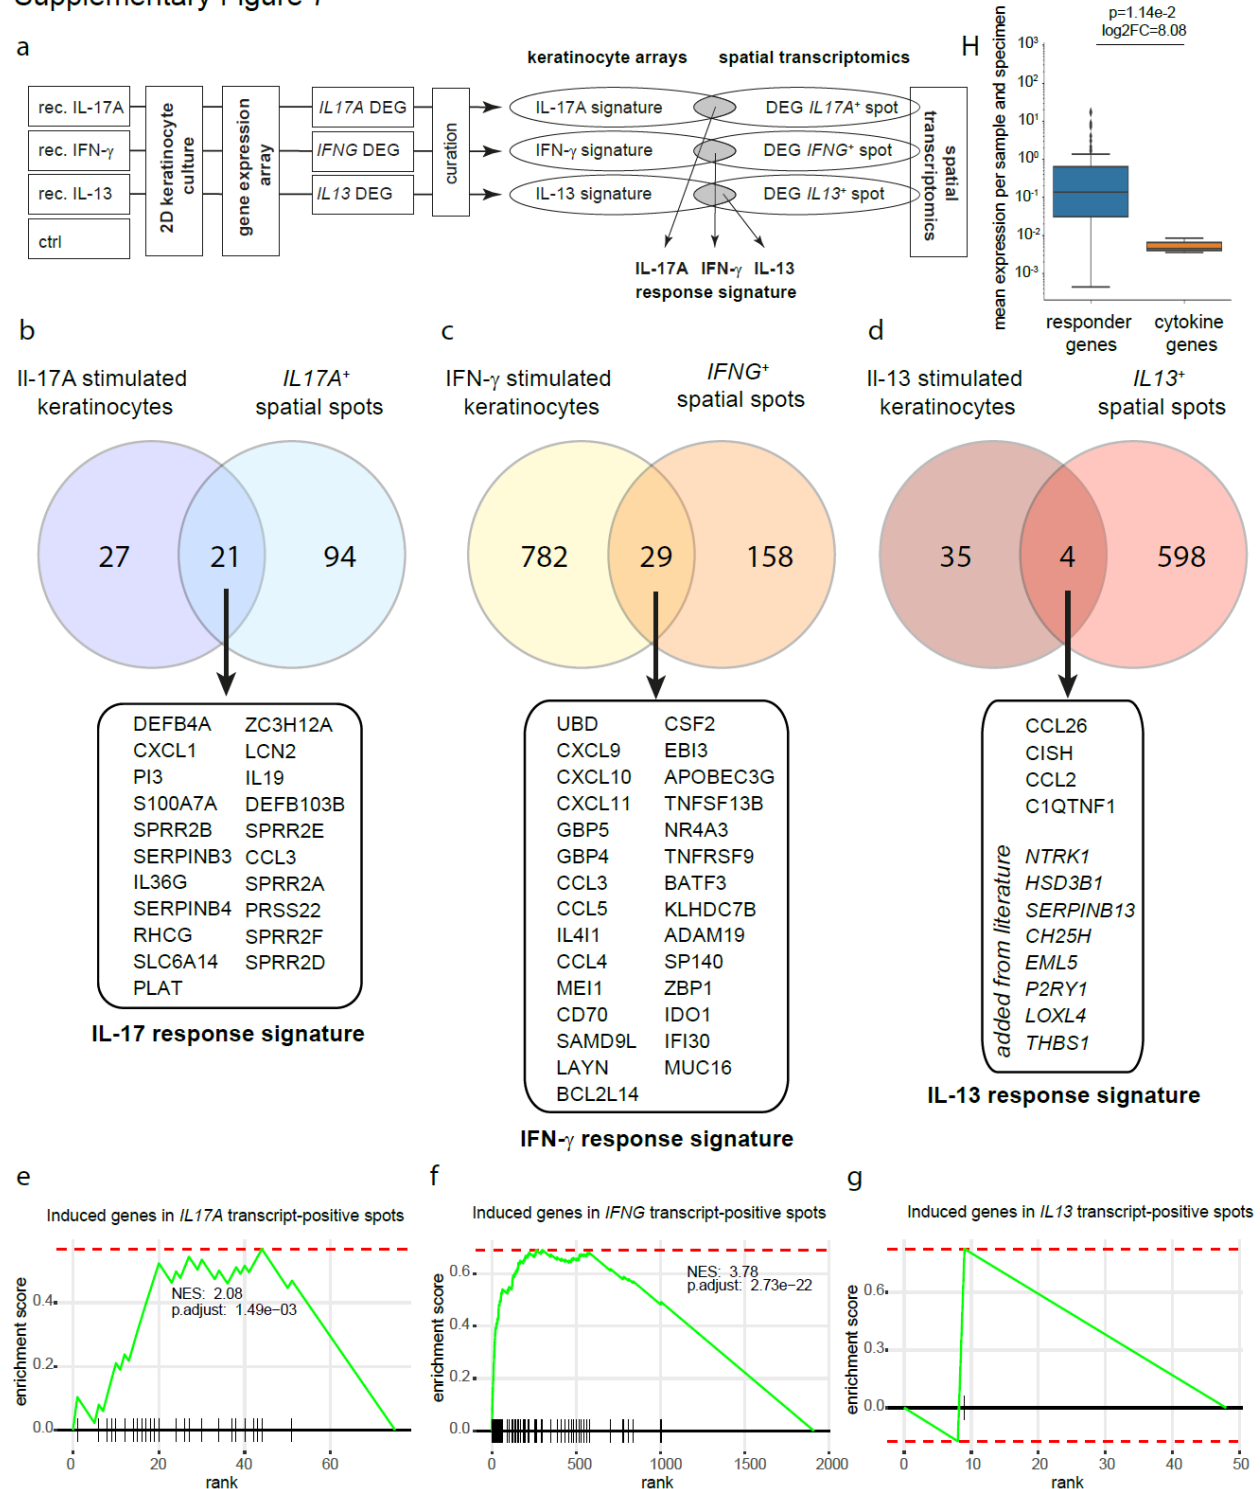

**Supplementary Figure 7: Identification of cytokine responder genes for spatial correlation**

**a)** Primary human keratinocytes were stimulated in 2D cultures with recombinant IL-17A, IFN- $\gamma$ , or IL-13 (20 ng/ml each) for 16 h. Total RNA was isolated and whole genome expression arrays (SurePrint G3 Human GE 8X60K BeadChip (Agilent Technologies)) were performed according to the manufacturer's instructions. Gene expression data was filtered for p-value <0.05, adjusted p-value <0.05 and log<sub>2</sub> FC >1.5



for IL-17A and IFN- $\gamma$  or  $\log_2FC > 1$  for IL-13. Differential genes co-expressed in cytokine stimulated keratinocytes and cytokine transcript-positive spatial spots were determined for IL17-A, IFN-g, and IL-13 and overlapping genes were defined as response signature for each cytokine. Specific response signatures for **b)** IL17-A, **c)** IFN-g and **d)** IL-13. For *IL 13* only 4 genes were commonly expressed, therefore, additional genes were added according to literature analysis. Enrichment analysis of response signature genes for **e)** *IL 17A*, **f)** *IFNG*, and **g)** *IL 13* (black bars) within the DEGs of the respective cytokine transcript-positive spots. **h)** Mean expression per sample and specimen of cytokines (*IFNG*, *IL 13*, *IL 17A*) and their specific responder genes in lesional skin samples (n=31). Responder genes are depicted in blue, cytokine genes in orange. Two-sided Mann-Whitney test was used to calculate the p-value. (responder genes; cytokine genes): median (1e-1; 0), mean (1.48; 5.49e-3), min (0; 0), max (1.3; 0), Q1(0;0), Q3 (46e-1; 0), whiskers (0; 46e-1).

**a**

**a-c)** To identify potentially new cytokine-related responder genes, differentially expressed genes (DEG) between the optimal radius of each cytokine (*IFNG* radius 4 (**a**); *IL13* radius 3 (**b**) and *IL17A* radius 0 (**c**)) and cytokine transcript-negative spots outside this optimal radius were determined and presented as a zoomed-in Volcano plot). Experimentally identified responder genes (see Fig. S7) (gold (p-adj <0.05, abs(log2FC) >1) or grey (p-adj >0.05)) and new, data-derived cytokine associated genes (up-regulated in blue; down-regulated in red) are shown. **d-g)** Reactome pathways for *IFNG*-related (**d**), *IL13*-related (**e**) and *IL17A*-related (**f**) genes as shown in Fig. S8 A-C (padj <0.05, abs(log2FC) >1). **g-i)** Pathway enrichment

analysis of top three pathways for *IFNG*-related (**g**), *IL13*-related (**h**) and *IL17A*-related (**i**) genes (p-adj <0.05, abs(log2FC) >1). Benjamini Hochberg was used to determine statistical significance in a-f).

## Supplementary Tables

|                   | sex | n | age           | severity score                                    |
|-------------------|-----|---|---------------|---------------------------------------------------|
| Psoriasis         | m   | 7 | 41,14 ± 14,74 | PASI: 11,76 ± 4,97                                |
|                   | w   | 4 | 56,75 ± 9,54  | PASI: 9,95 ± 3,74                                 |
| Atopic dermatitis | m   | 8 | 49,38 ± 7,48  | EASI (n=4): 22,35 ± 11,75<br>SCORAD (n=2): 58 ± 9 |
|                   | w   | 1 | 21            | 56                                                |
| Lichen planus     | m   | 6 | 40,67 ± 10,39 | no score available                                |
|                   | w   | 5 | 56,6 ± 7,8    | no score available                                |

**Supplementary Table 1:** Patient characteristics of the spatial transcriptomics cohort

| Disease | Patient | slide number        | non-lesional (nl)<br>lesional (l) | Number of<br>spots/section | Total UMI<br>count/section | Median UMI<br>count/spot/section | Number IFNg+<br>spots/section | Median IFNg UMI<br>count/IFNg+ spot | Number IL13+<br>spots/section | Median IL-13 UMI<br>count/IL-13+ spot | Number IL17+<br>spots/section | Median IL-17 UMI<br>count/IL-17+ spot |
|---------|---------|---------------------|-----------------------------------|----------------------------|----------------------------|----------------------------------|-------------------------------|-------------------------------------|-------------------------------|---------------------------------------|-------------------------------|---------------------------------------|
| AD      | 2       | 2-V19S23-004-V1_2   | nl                                | 587                        | 3332849                    | 920                              | 0                             | 0                                   | 0                             | 0                                     | 0                             | 0                                     |
|         |         | 2-V19S23-004-V2_2   | nl                                | 464                        | 3758790                    | 1239                             | 0                             | 0                                   | 0                             | 0                                     | 0                             | 0                                     |
|         |         | 2-V19S23-004-V3_2   | l                                 | 527                        | 7298036                    | 1305                             | 0                             | 0                                   | 2                             | 1                                     | 0                             | 0                                     |
|         |         | 2-V19S23-004-V4_2   | l                                 | 524                        | 11691137                   | 4506,5                           | 0                             | 0                                   | 0                             | 0                                     | 0                             | 0                                     |
|         | 5       | 5-V19S18-093-V1_5   | nl                                | 525                        | 1050295                    | 98                               | 0                             | 0                                   | 0                             | 0                                     | 0                             | 0                                     |
|         |         | 5-V19S18-093-V2_5   | nl                                | 768                        | 1865251                    | 151                              | 0                             | 0                                   | 0                             | 0                                     | 0                             | 0                                     |
|         |         | 5-V19S18-093-V3_5   | l                                 | 442                        | 2299813                    | 803                              | 0                             | 0                                   | 0                             | 0                                     | 0                             | 0                                     |
|         |         | 5-V19S18-093-V4_5   | l                                 | 469                        | 1861982                    | 477                              | 0                             | 0                                   | 0                             | 0                                     | 0                             | 0                                     |
|         | 8       | 8-V19T12-006-V1_8   | nl                                | 698                        | 4526990                    | 382,5                            | 0                             | 0                                   | 3                             | 1                                     | 0                             | 0                                     |
|         |         | 8-V19T12-006-V2_8   | nl                                | 765                        | 1120717                    | 325                              | 0                             | 0                                   | 0                             | 0                                     | 0                             | 0                                     |
|         |         | 8-V19T12-006-V3_8   | l                                 | 697                        | 2062754                    | 2113                             | 1                             | 1                                   | 1                             | 1                                     | 0                             | 0                                     |
|         |         | 8-V19T12-006-V4_8   | l                                 | 706                        | 8743365                    | 2524                             | 1                             | 1                                   | 3                             | 1                                     | 0                             | 0                                     |
|         | 11      | 11-V19T12-012-V1_11 | nl                                | 305                        | 1443493                    | 2063                             | 2                             | 1                                   | 0                             | 0                                     | 0                             | 0                                     |
|         |         | 11-V19T12-012-V2_11 | nl                                | 545                        | 2146796                    | 861                              | 0                             | 0                                   | 1                             | 1                                     | 0                             | 0                                     |
|         |         | 11-V19T12-012-V3_11 | l                                 | 713                        | 3519737                    | 494                              | 0                             | 0                                   | 1                             | 1                                     | 0                             | 0                                     |
|         |         | 11-V19T12-012-V4_11 | l                                 | 923                        | 3765271                    | 619                              | 0                             | 0                                   | 0                             | 0                                     | 0                             | 0                                     |
|         | 15      | 15-V19S18-092-V1_15 | l                                 | 1350                       | 4945612                    | 45                               | 2                             | 1                                   | 2                             | 1                                     | 0                             | 0                                     |
|         |         | 15-V19S18-092-V2_15 | l                                 | 1504                       | 5490636                    | 84                               | 1                             | 1                                   | 1                             | 2                                     | 0                             | 0                                     |
|         | 20      | SN-V11J13-122_A_20  | l                                 | 181                        | 2018930                    | 2115                             | 1                             | 1                                   | 1                             | 1                                     | 0                             | 0                                     |
|         |         | SN-V11J13-122_B_20  | l                                 | 727                        | 4756457                    | 1803                             | 1                             | 1                                   | 3                             | 1                                     | 0                             | 0                                     |
|         | 34      | SN-V11J13-122_A_34  | l                                 | 248                        | 15579630                   | 40857,5                          | 1                             | 1                                   | 10                            | 1                                     | 0                             | 0                                     |
|         |         | SN-V11J13-122_B_34  | l                                 | 358                        | 16844100                   | 25051,5                          | 2                             | 1                                   | 11                            | 1                                     | 0                             | 0                                     |
|         | 35      | SN-V11J13-122_C_35  | l                                 | 995                        | 8778245                    | 1346                             | 1                             | 1                                   | 2                             | 1                                     | 1                             | 1                                     |
|         |         | SN-V11J13-122_D_35  | l                                 | 986                        | 9860581                    | 1278                             | 4                             | 1                                   | 6                             | 1                                     | 0                             | 0                                     |
|         | 36      | SN-V11J13-122_C_36  | l                                 | 102                        | 632857                     | 235                              | 0                             | 0                                   | 0                             | 0                                     | 0                             | 0                                     |
|         |         | SN-V11J13-122_D_36  | l                                 | 47                         | 694052                     | 325                              | 0                             | 0                                   | 0                             | 0                                     | 0                             | 0                                     |
| LP      | 3       | 3-V19S23-005-V1_3   | nl                                | 546                        | 1148998                    | 746,5                            | 0                             | 0                                   | 0                             | 0                                     | 0                             | 0                                     |
|         |         | 3-V19S23-005-V2_3   | nl                                | 549                        | 1032311                    | 667                              | 1                             | 1                                   | 0                             | 0                                     | 0                             | 0                                     |
|         |         | 3-V19S23-005-V3_3   | l                                 | 450                        | 7837183                    | 2097                             | 1                             | 1                                   | 2                             | 1                                     | 0                             | 0                                     |
|         |         | 3-V19S23-005-V4_3   | l                                 | 825                        | 14444608                   | 4877                             | 16                            | 1                                   | 4                             | 1                                     | 0                             | 0                                     |
|         | 6       | 6-V19T12-047-V1_6   | nl                                | 666                        | 1232549                    | 189,5                            | 0                             | 0                                   | 0                             | 0                                     | 0                             | 0                                     |
|         |         | 6-V19T12-047-V2_6   | nl                                | 706                        | 784663                     | 240                              | 0                             | 0                                   | 0                             | 0                                     | 0                             | 0                                     |
|         |         | 6-V19T12-047-V3_6   | l                                 | 1000                       | 15217246                   | 1137                             | 37                            | 1                                   | 7                             | 1                                     | 2                             | 1                                     |
|         |         | 6-V19T12-047-V4_6   | l                                 | 985                        | 14144635                   | 1965                             | 31                            | 1                                   | 6                             | 1                                     | 0                             | 0                                     |
|         | 9       | 9-V19T12-015-V1_9   | nl                                | 508                        | 3532882                    | 2077,5                           | 0                             | 0                                   | 0                             | 0                                     | 0                             | 0                                     |
|         |         | 9-V19T12-015-V2_9   | nl                                | 566                        | 3094003                    | 1740,5                           | 0                             | 0                                   | 0                             | 0                                     | 0                             | 0                                     |
|         |         | 9-V19T12-015-V3_9   | l                                 | 814                        | 9496593                    | 2378,5                           | 15                            | 1                                   | 1                             | 1                                     | 0                             | 0                                     |
|         |         | 9-V19T12-015-V4_9   | l                                 | 913                        | 9264034                    | 2570                             | 19                            | 1                                   | 2                             | 1                                     | 0                             | 0                                     |
|         | 12      | 12-V19T12-021-V1_12 | nl                                | 625                        | 1438737                    | 696                              | 0                             | 0                                   | 0                             | 0                                     | 0                             | 0                                     |
|         |         | 12-V19T12-021-V2_12 | nl                                | 651                        | 1729572                    | 679                              | 0                             | 0                                   | 0                             | 0                                     | 0                             | 0                                     |
|         |         | 12-V19T12-021-V3_12 | l                                 | 695                        | 5987919                    | 1159                             | 8                             | 1                                   | 1                             | 1                                     | 0                             | 0                                     |
|         |         | 12-V19T12-021-V4_12 | l                                 | 1040                       | 8870277                    | 1496,5                           | 30                            | 1                                   | 12                            | 1                                     | 0                             | 0                                     |
|         | 14      | 14-V19T12-024-V1_14 | nl                                | 598                        | 738422                     | 38,5                             | 0                             | 0                                   | 0                             | 0                                     | 0                             | 0                                     |
|         |         | 14-V19T12-024-V2_14 | nl                                | 744                        | 422422                     | 59                               | 0                             | 0                                   | 0                             | 0                                     | 0                             | 0                                     |
|         |         | 14-V19T12-024-V3_14 | l                                 | 1122                       | 13046660                   | 223,5                            | 6                             | 1                                   | 0                             | 0                                     | 3                             | 2                                     |
|         |         | 14-V19T12-024-V4_14 | l                                 | 1117                       | 8378001                    | 127                              | 2                             | 1                                   | 0                             | 0                                     | 0                             | 0                                     |
|         | 25      | SN-V11J13-122_A_25  | l                                 | 307                        | 8348512                    | 20988                            | 1                             | 1                                   | 0                             | 0                                     | 0                             | 0                                     |
|         |         | SN-V11J13-122_B_25  | l                                 | 1428                       | 19259028                   | 6320                             | 20                            | 1                                   | 1                             | 1                                     | 0                             | 0                                     |
|         | 26      | SN-V11J13-120_A_26  | l                                 | 1222                       | 577953                     | 206,5                            | 1                             | 1                                   | 0                             | 0                                     | 0                             | 0                                     |
|         |         | SN-V11J13-120_B_26  | l                                 | 1169                       | 1162702                    | 302                              | 0                             | 0                                   | 1                             | 1                                     | 0                             | 0                                     |
|         | 27      | SN-V11J13-120_C_27  | l                                 | 727                        | 542865                     | 187                              | 0                             | 0                                   | 0                             | 0                                     | 0                             | 0                                     |
|         |         | SN-V11J13-120_D_27  | l                                 | 810                        | 881062                     | 410                              | 0                             | 0                                   | 0                             | 0                                     | 0                             | 0                                     |
|         | 28      | SN-V11J13-119_C_28  | l                                 | 971                        | 2082618                    | 659                              | 4                             | 1                                   | 0                             | 0                                     | 0                             | 0                                     |
|         |         | SN-V11J13-119_D_28  | l                                 | 1064                       | 14142627                   | 5820,5                           | 4                             | 1                                   | 1                             | 1                                     | 1                             | 1                                     |
|         | 30      | SN-V11J13-120_A_30  | l                                 | 729                        | 604015                     | 596                              | 9                             | 1                                   | 6                             | 1                                     | 0                             | 0                                     |
|         |         | SN-V11J13-120_B_30  | l                                 | 898                        | 1372578                    | 780                              | 3                             | 1                                   | 2                             | 1                                     | 0                             | 0                                     |
|         | 37      | SN-V11J13-120_C_37  | l                                 | 627                        | 423276                     | 411                              | 1                             | 1                                   | 0                             | 0                                     | 0                             | 0                                     |
|         |         | SN-V11J13-120_D_37  | l                                 | 584                        | 481369                     | 465                              | 2                             | 1                                   | 1                             | 1                                     | 0                             | 0                                     |
| Pso     | 1       | V19S23-003-V1_1     | nl                                | 818                        | 719053                     | 243                              | 0                             | 0                                   | 0                             | 0                                     | 0                             | 0                                     |
|         |         | V19S23-003-V2_1     | nl                                | 777                        | 304605                     | 41                               | 0                             | 0                                   | 0                             | 0                                     | 0                             | 0                                     |
|         |         | V19S23-003-V3_1     | l                                 | 909                        | 7325920                    | 242                              | 20                            | 1                                   | 0                             | 0                                     | 16                            | 1                                     |
|         |         | V19S23-003-V4_1     | l                                 | 752                        | 8024328                    | 1574,5                           | 15                            | 1                                   | 0                             | 0                                     | 27                            | 1                                     |
|         | 10      | 10-V19T12-025-V1_10 | nl                                | 617                        | 446231                     | 192                              | 0                             | 0                                   | 0                             | 0                                     | 0                             | 0                                     |
|         |         | 10-V19T12-025-V2_10 | nl                                | 585                        | 679701                     | 151                              | 0                             | 0                                   | 0                             | 0                                     | 0                             | 0                                     |
|         |         | 10-V19T12-025-V3_10 | l                                 | 1021                       | 5873368                    | 552                              | 4                             | 1                                   | 0                             | 0                                     | 4                             | 1                                     |
|         |         | 10-V19T12-025-V4_10 | l                                 | 1014                       | 4245034                    | 539                              | 3                             | 1                                   | 0                             | 0                                     | 8                             | 1                                     |
|         | 13      | 13-V19T12-048-V1_13 | nl                                | 790                        | 2225142                    | 452,5                            | 0                             | 0                                   | 0                             | 0                                     | 0                             | 0                                     |
|         |         | 13-V19T12-048-V2_13 | nl                                | 791                        | 1563868                    | 287                              | 0                             | 0                                   | 0                             | 0                                     | 0                             | 0                                     |
|         |         | 13-V19T12-048-V3_13 | l                                 | 1144                       | 4970420                    | 297,5                            | 2                             | 1                                   | 2                             | 1                                     | 7                             | 1                                     |
|         |         | 13-V19T12-048-V4_13 | l                                 | 1414                       | 6686569                    | 502                              | 2                             | 1                                   | 0                             | 0                                     | 3                             | 1                                     |
|         | 19      | SN-V10N16-107_A_19  | l                                 | 1079                       | 15269051                   | 1983                             | 0                             | 0                                   | 0                             | 0                                     | 5                             | 1                                     |
|         |         | SN-V10N16-107_B_19  | l                                 | 997                        | 15906332                   | 3798                             | 4                             | 1                                   | 0                             | 0                                     | 2                             | 1                                     |
|         | 22      | SN-V10N16-107_A_22  | l                                 | 885                        | 13980294                   | 3050                             | 15                            | 1                                   | 0                             | 0                                     | 15                            | 1                                     |
|         |         | SN-V10N16-107_B_22  | l                                 | 909                        | 13551685                   | 2874                             | 11                            | 1                                   | 0                             | 0                                     | 12                            | 1                                     |
|         | 29      | SN-V10N16-107_C_29  | l                                 | 691                        | 2311770                    | 889                              | 2                             | 1                                   | 0                             | 0                                     | 3                             | 1                                     |
|         |         | SN-V10N16-107_D_29  | l                                 | 736                        | 1600795                    | 956,5                            | 2                             | 1                                   | 1                             | 1                                     | 2                             | 1,5                                   |
|         | 31      | SN-V11J13-119_A_31  | l                                 | 1276                       | 23903564                   | 3004,5                           | 6                             | 1                                   | 0                             | 0                                     | 7                             | 1                                     |
|         |         | SN-V11J13-119_B_31  | l                                 | 696                        | 15673596                   | 4435                             | 3                             | 1                                   | 0                             | 0                                     | 4                             | 1                                     |
|         | 32      | SN-V11J13-119_A_32  | l                                 | 703                        | 10738392                   | 2694                             | 4                             | 2,5                                 | 1                             | 1                                     | 7                             | 1                                     |
|         |         | SN-V11J13-119_B_32  | l                                 | 557                        | 14396251                   | 6936                             | 8                             | 1                                   | 4                             | 1                                     | 5                             | 2                                     |
|         | 33      | SN-V11J13-119_C_33  | l                                 | 1072                       | 8954280                    | 2530                             | 15                            | 1                                   | 0                             | 0                                     | 12                            | 1                                     |
|         |         | SN-V11J13-119_D_33  | l                                 | 923                        | 28657774                   | 6991                             | 28                            | 1                                   | 1                             | 1                                     | 8                             | 1                                     |

**Supplementary Table 2:** Overview on number of spots, UMI counts and cytokine transcript-positive spots in the ST dataset
